# Supplementary material for: Screening of Genes Related to Early and Late Flowering in Tree Peony Based on Bulked Segregant RNA Sequencing and Verification by Quantitative Real-Time PCR
Source: MDPI journal article supplement (doi:10.3390/molecules23030689), 2018-03-19
Supplement: s1 [file s1]

**Table S1 Results of assembling sequencing data**

| <b>Length Range</b> | <b>Contig</b>     | <b>Transcript</b> | <b>Unigene</b> |
|---------------------|-------------------|-------------------|----------------|
| 200-300             | 3,391,448(98.08%) | 35,825(20.59%)    | 28,675(36.46%) |
| 300-500             | 26,209(0.76%)     | 29,784(17.12%)    | 18,590(23.64%) |
| 500-1000            | 20,612(0.60%)     | 37,489(21.55%)    | 14,495(18.43%) |
| 1000-2000           | 13,563(0.39%)     | 42,831(24.62%)    | 10,892(13.85%) |
| 2000+               | 5,900(0.17%)      | 28,031(16.11%)    | 5,993(7.62%)   |
| Total Number        | 3,457,732         | 173,960           | 78,645         |
| Total Length        | 204,735,802       | 192,528,500       | 57,589,618     |
| N50 Length          | 49                | 1781              | 1282           |
| Mean Length         | 59.211            | 1106.74           | 732.27         |

**Table S2 291 genes with significant enrichment for the association loci**

| <b>Chr</b>      | <b>AllCount</b> | <b>AssoCount</b> | <b>P-value</b> | <b>FDR</b> |
|-----------------|-----------------|------------------|----------------|------------|
| c42942.graph_c0 | 4               | 4                | 0              | 0          |
| c43262.graph_c0 | 4               | 4                | 0              | 0          |
| c44957.graph_c0 | 4               | 4                | 0              | 0          |
| c46352.graph_c0 | 4               | 4                | 0              | 0          |
| c50822.graph_c0 | 11              | 11               | 0              | 0          |
| c54685.graph_c0 | 14              | 10               | 0              | 0          |
| c55121.graph_c0 | 9               | 8                | 0              | 0          |
| c58332.graph_c0 | 9               | 7                | 0              | 0          |
| c58361.graph_c0 | 13              | 12               | 0              | 0          |
| c48021.graph_c0 | 6               | 5                | 1.63E-13       | 2.63E-10   |
| c57940.graph_c0 | 17              | 7                | 2.03E-13       | 2.97E-10   |
| c54876.graph_c0 | 17              | 6                | 2.19E-11       | 2.94E-08   |
| c38215.graph_c0 | 7               | 4                | 4.58E-10       | 5.68E-07   |
| c57417.graph_c0 | 16              | 5                | 1.23E-09       | 1.41E-06   |
| c18087.graph_c0 | 4               | 3                | 2.99E-09       | 2.30E-06   |
| c39158.graph_c0 | 4               | 3                | 2.99E-09       | 2.30E-06   |
| c44829.graph_c0 | 4               | 3                | 2.99E-09       | 2.30E-06   |
| c48861.graph_c0 | 4               | 3                | 2.99E-09       | 2.30E-06   |
| c53204.graph_c0 | 9               | 4                | 2.72E-09       | 2.30E-06   |
| c58096.graph_c0 | 4               | 3                | 2.99E-09       | 2.30E-06   |
| c58556.graph_c1 | 9               | 4                | 2.72E-09       | 2.30E-06   |
| c56705.graph_c0 | 21              | 5                | 8.04E-09       | 5.89E-06   |
| c41733.graph_c0 | 5               | 3                | 1.49E-08       | 9.59E-06   |
| c48857.graph_c0 | 5               | 3                | 1.49E-08       | 9.59E-06   |
| c53813.graph_c0 | 5               | 3                | 1.49E-08       | 9.59E-06   |
| c49024.graph_c0 | 12              | 4                | 1.68E-08       | 9.65E-06   |
| c53060.graph_c0 | 12              | 4                | 1.68E-08       | 9.65E-06   |
| c55738.graph_c0 | 12              | 4                | 1.68E-08       | 9.65E-06   |
| c47080.graph_c0 | 6               | 3                | 4.44E-08       | 2.10E-05   |
| c55633.graph_c0 | 14              | 4                | 4.19E-08       | 2.10E-05   |
| c56403.graph_c0 | 6               | 3                | 4.44E-08       | 2.10E-05   |
| c58526.graph_c0 | 14              | 4                | 4.19E-08       | 2.10E-05   |
| c58710.graph_c0 | 6               | 3                | 4.44E-08       | 2.10E-05   |
| c59042.graph_c1 | 6               | 3                | 4.44E-08       | 2.10E-05   |
| c50926.graph_c0 | 7               | 3                | 1.03E-07       | 4.74E-05   |
| c53143.graph_c0 | 8               | 3                | 2.05E-07       | 9.16E-05   |
| c22844.graph_c0 | 3               | 2                | 4.05E-07       | 9.95E-05   |
| c27895.graph_c0 | 3               | 2                | 4.05E-07       | 9.95E-05   |
| c31028.graph_c0 | 3               | 2                | 4.05E-07       | 9.95E-05   |
| c31880.graph_c0 | 3               | 2                | 4.05E-07       | 9.95E-05   |
| c31918.graph_c0 | 3               | 2                | 4.05E-07       | 9.95E-05   |

|                 |    |   |          |          |
|-----------------|----|---|----------|----------|
| c32101.graph_c0 | 3  | 2 | 4.05E-07 | 9.95E-05 |
| c33415.graph_c0 | 3  | 2 | 4.05E-07 | 9.95E-05 |
| c36201.graph_c0 | 3  | 2 | 4.05E-07 | 9.95E-05 |
| c37008.graph_c1 | 3  | 2 | 4.05E-07 | 9.95E-05 |
| c39180.graph_c0 | 3  | 2 | 4.05E-07 | 9.95E-05 |
| c39738.graph_c0 | 3  | 2 | 4.05E-07 | 9.95E-05 |
| c40112.graph_c0 | 3  | 2 | 4.05E-07 | 9.95E-05 |
| c40724.graph_c0 | 3  | 2 | 4.05E-07 | 9.95E-05 |
| c41177.graph_c0 | 3  | 2 | 4.05E-07 | 9.95E-05 |
| c41266.graph_c0 | 3  | 2 | 4.05E-07 | 9.95E-05 |
| c41848.graph_c0 | 3  | 2 | 4.05E-07 | 9.95E-05 |
| c42177.graph_c0 | 3  | 2 | 4.05E-07 | 9.95E-05 |
| c44913.graph_c0 | 3  | 2 | 4.05E-07 | 9.95E-05 |
| c45192.graph_c0 | 3  | 2 | 4.05E-07 | 9.95E-05 |
| c45808.graph_c0 | 3  | 2 | 4.05E-07 | 9.95E-05 |
| c48601.graph_c0 | 3  | 2 | 4.05E-07 | 9.95E-05 |
| c52684.graph_c0 | 3  | 2 | 4.05E-07 | 9.95E-05 |
| c53420.graph_c0 | 9  | 3 | 3.66E-07 | 9.95E-05 |
| c54328.graph_c0 | 3  | 2 | 4.05E-07 | 9.95E-05 |
| c54369.graph_c0 | 3  | 2 | 4.05E-07 | 9.95E-05 |
| c55385.graph_c0 | 3  | 2 | 4.05E-07 | 9.95E-05 |
| c56440.graph_c0 | 21 | 4 | 4.08E-07 | 9.95E-05 |
| c56666.graph_c0 | 3  | 2 | 4.05E-07 | 9.95E-05 |
| c57254.graph_c0 | 3  | 2 | 4.05E-07 | 9.95E-05 |
| c57801.graph_c1 | 3  | 2 | 4.05E-07 | 9.95E-05 |
| c54393.graph_c0 | 11 | 3 | 9.48E-07 | 0.000228 |
| c27548.graph_c0 | 4  | 2 | 1.61E-06 | 0.00026  |
| c33977.graph_c0 | 4  | 2 | 1.61E-06 | 0.00026  |
| c34439.graph_c0 | 4  | 2 | 1.61E-06 | 0.00026  |
| c34723.graph_c0 | 4  | 2 | 1.61E-06 | 0.00026  |
| c34936.graph_c0 | 4  | 2 | 1.61E-06 | 0.00026  |
| c35343.graph_c0 | 4  | 2 | 1.61E-06 | 0.00026  |
| c35966.graph_c0 | 4  | 2 | 1.61E-06 | 0.00026  |
| c36215.graph_c0 | 4  | 2 | 1.61E-06 | 0.00026  |
| c37960.graph_c0 | 4  | 2 | 1.61E-06 | 0.00026  |
| c38258.graph_c0 | 4  | 2 | 1.61E-06 | 0.00026  |
| c39612.graph_c0 | 4  | 2 | 1.61E-06 | 0.00026  |
| c40196.graph_c0 | 4  | 2 | 1.61E-06 | 0.00026  |
| c40205.graph_c0 | 4  | 2 | 1.61E-06 | 0.00026  |
| c40564.graph_c0 | 4  | 2 | 1.61E-06 | 0.00026  |
| c42508.graph_c0 | 4  | 2 | 1.61E-06 | 0.00026  |
| c42840.graph_c0 | 4  | 2 | 1.61E-06 | 0.00026  |
| c46112.graph_c0 | 4  | 2 | 1.61E-06 | 0.00026  |
| c46153.graph_c0 | 4  | 2 | 1.61E-06 | 0.00026  |

|                 |    |   |          |          |
|-----------------|----|---|----------|----------|
| c46503.graph_c0 | 4  | 2 | 1.61E-06 | 0.00026  |
| c47084.graph_c0 | 4  | 2 | 1.61E-06 | 0.00026  |
| c50230.graph_c0 | 4  | 2 | 1.61E-06 | 0.00026  |
| c51992.graph_c0 | 4  | 2 | 1.61E-06 | 0.00026  |
| c52467.graph_c0 | 4  | 2 | 1.61E-06 | 0.00026  |
| c53043.graph_c0 | 4  | 2 | 1.61E-06 | 0.00026  |
| c53670.graph_c0 | 4  | 2 | 1.61E-06 | 0.00026  |
| c54850.graph_c0 | 4  | 2 | 1.61E-06 | 0.00026  |
| c56412.graph_c0 | 4  | 2 | 1.61E-06 | 0.00026  |
| c56436.graph_c0 | 4  | 2 | 1.61E-06 | 0.00026  |
| c57149.graph_c1 | 12 | 3 | 1.41E-06 | 0.00026  |
| c57468.graph_c0 | 4  | 2 | 1.61E-06 | 0.00026  |
| c58811.graph_c0 | 27 | 4 | 1.56E-06 | 0.00026  |
| c60694.graph_c0 | 4  | 2 | 1.61E-06 | 0.00026  |
| c9420.graph_c0  | 4  | 2 | 1.61E-06 | 0.00026  |
| c55848.graph_c0 | 13 | 3 | 2.03E-06 | 0.000317 |
| c56456.graph_c0 | 13 | 3 | 2.03E-06 | 0.000317 |
| c57975.graph_c1 | 13 | 3 | 2.03E-06 | 0.000317 |
| c54243.graph_c0 | 14 | 3 | 2.83E-06 | 0.000438 |
| c36503.graph_c0 | 5  | 2 | 4.01E-06 | 0.000577 |
| c43623.graph_c0 | 5  | 2 | 4.01E-06 | 0.000577 |
| c43817.graph_c0 | 5  | 2 | 4.01E-06 | 0.000577 |
| c46274.graph_c0 | 5  | 2 | 4.01E-06 | 0.000577 |
| c54200.graph_c0 | 5  | 2 | 4.01E-06 | 0.000577 |
| c55972.graph_c1 | 5  | 2 | 4.01E-06 | 0.000577 |
| c56577.graph_c0 | 5  | 2 | 4.01E-06 | 0.000577 |
| c59086.graph_c0 | 5  | 2 | 4.01E-06 | 0.000577 |
| c56246.graph_c0 | 16 | 3 | 5.08E-06 | 0.000724 |
| c40556.graph_c0 | 6  | 2 | 7.97E-06 | 0.001027 |
| c49083.graph_c0 | 6  | 2 | 7.97E-06 | 0.001027 |
| c49692.graph_c0 | 6  | 2 | 7.97E-06 | 0.001027 |
| c50698.graph_c0 | 6  | 2 | 7.97E-06 | 0.001027 |
| c51543.graph_c0 | 6  | 2 | 7.97E-06 | 0.001027 |
| c51897.graph_c0 | 6  | 2 | 7.97E-06 | 0.001027 |
| c51930.graph_c0 | 6  | 2 | 7.97E-06 | 0.001027 |
| c52396.graph_c0 | 6  | 2 | 7.97E-06 | 0.001027 |
| c53220.graph_c0 | 6  | 2 | 7.97E-06 | 0.001027 |
| c55278.graph_c0 | 6  | 2 | 7.97E-06 | 0.001027 |
| c58080.graph_c0 | 6  | 2 | 7.97E-06 | 0.001027 |
| c58184.graph_c2 | 6  | 2 | 7.97E-06 | 0.001027 |
| c40743.graph_c0 | 7  | 2 | 1.39E-05 | 0.001656 |
| c45422.graph_c0 | 7  | 2 | 1.39E-05 | 0.001656 |
| c45499.graph_c0 | 7  | 2 | 1.39E-05 | 0.001656 |
| c45835.graph_c0 | 7  | 2 | 1.39E-05 | 0.001656 |

|                 |    |   |             |          |
|-----------------|----|---|-------------|----------|
| c46351.graph_c0 | 7  | 2 | 1.39E-05    | 0.001656 |
| c46642.graph_c0 | 7  | 2 | 1.39E-05    | 0.001656 |
| c48760.graph_c0 | 7  | 2 | 1.39E-05    | 0.001656 |
| c49366.graph_c0 | 7  | 2 | 1.39E-05    | 0.001656 |
| c50750.graph_c0 | 7  | 2 | 1.39E-05    | 0.001656 |
| c57175.graph_c0 | 7  | 2 | 1.39E-05    | 0.001656 |
| c48597.graph_c0 | 8  | 2 | 2.21E-05    | 0.00247  |
| c48989.graph_c0 | 8  | 2 | 2.21E-05    | 0.00247  |
| c50301.graph_c0 | 8  | 2 | 2.21E-05    | 0.00247  |
| c54338.graph_c0 | 8  | 2 | 2.21E-05    | 0.00247  |
| c55796.graph_c1 | 8  | 2 | 2.21E-05    | 0.00247  |
| c56056.graph_c0 | 8  | 2 | 2.21E-05    | 0.00247  |
| c58512.graph_c0 | 8  | 2 | 2.21E-05    | 0.00247  |
| c58516.graph_c0 | 8  | 2 | 2.21E-05    | 0.00247  |
| c58585.graph_c0 | 8  | 2 | 2.21E-05    | 0.00247  |
| c58996.graph_c0 | 24 | 3 | 2.83E-05    | 0.003141 |
| c41422.graph_c0 | 9  | 2 | 3.29E-05    | 0.00349  |
| c46873.graph_c0 | 9  | 2 | 3.29E-05    | 0.00349  |
| c49475.graph_c0 | 9  | 2 | 3.29E-05    | 0.00349  |
| c54820.graph_c0 | 9  | 2 | 3.29E-05    | 0.00349  |
| c56081.graph_c0 | 9  | 2 | 3.29E-05    | 0.00349  |
| c57165.graph_c0 | 9  | 2 | 3.29E-05    | 0.00349  |
| c59006.graph_c0 | 9  | 2 | 3.29E-05    | 0.00349  |
| c58001.graph_c0 | 26 | 3 | 3.93E-05    | 0.004112 |
| c58740.graph_c0 | 26 | 3 | 3.93E-05    | 0.004112 |
| c48060.graph_c0 | 10 | 2 | 4.68E-05    | 0.004801 |
| c56384.graph_c1 | 10 | 2 | 4.68E-05    | 0.004801 |
| c59087.graph_c0 | 10 | 2 | 4.68E-05    | 0.004801 |
| c59079.graph_c0 | 54 | 4 | 5.17E-05    | 0.005275 |
| c49285.graph_c0 | 11 | 2 | 6.40E-05    | 0.006323 |
| c53284.graph_c0 | 11 | 2 | 6.40E-05    | 0.006323 |
| c53829.graph_c0 | 11 | 2 | 6.40E-05    | 0.006323 |
| c56345.graph_c0 | 11 | 2 | 6.40E-05    | 0.006323 |
| c58873.graph_c0 | 11 | 2 | 6.40E-05    | 0.006323 |
| c57362.graph_c0 | 12 | 2 | 8.48E-05    | 0.008282 |
| c57873.graph_c0 | 12 | 2 | 8.48E-05    | 0.008282 |
| c18390.graph_c0 | 3  | 1 | 0.000163646 | 0.009153 |
| c20242.graph_c0 | 3  | 1 | 0.000163646 | 0.009153 |
| c21244.graph_c0 | 3  | 1 | 0.000163646 | 0.009153 |
| c22996.graph_c0 | 3  | 1 | 0.000163646 | 0.009153 |
| c23385.graph_c0 | 3  | 1 | 0.000163646 | 0.009153 |
| c24627.graph_c0 | 3  | 1 | 0.000163646 | 0.009153 |
| c27123.graph_c0 | 3  | 1 | 0.000163646 | 0.009153 |
| c28982.graph_c0 | 3  | 1 | 0.000163646 | 0.009153 |

---

|                 |   |   |             |          |
|-----------------|---|---|-------------|----------|
| c30026.graph_c0 | 3 | 1 | 0.000163646 | 0.009153 |
| c30067.graph_c0 | 3 | 1 | 0.000163646 | 0.009153 |
| c30277.graph_c0 | 3 | 1 | 0.000163646 | 0.009153 |
| c31037.graph_c0 | 3 | 1 | 0.000163646 | 0.009153 |
| c32193.graph_c0 | 3 | 1 | 0.000163646 | 0.009153 |
| c34617.graph_c0 | 3 | 1 | 0.000163646 | 0.009153 |
| c35512.graph_c0 | 3 | 1 | 0.000163646 | 0.009153 |
| c35765.graph_c0 | 3 | 1 | 0.000163646 | 0.009153 |
| c36624.graph_c0 | 3 | 1 | 0.000163646 | 0.009153 |
| c36807.graph_c0 | 3 | 1 | 0.000163646 | 0.009153 |
| c36999.graph_c0 | 3 | 1 | 0.000163646 | 0.009153 |
| c37171.graph_c0 | 3 | 1 | 0.000163646 | 0.009153 |
| c37472.graph_c0 | 3 | 1 | 0.000163646 | 0.009153 |
| c37547.graph_c0 | 3 | 1 | 0.000163646 | 0.009153 |
| c37820.graph_c0 | 3 | 1 | 0.000163646 | 0.009153 |
| c38048.graph_c0 | 3 | 1 | 0.000163646 | 0.009153 |
| c38084.graph_c0 | 3 | 1 | 0.000163646 | 0.009153 |
| c38623.graph_c0 | 3 | 1 | 0.000163646 | 0.009153 |
| c38661.graph_c0 | 3 | 1 | 0.000163646 | 0.009153 |
| c38691.graph_c0 | 3 | 1 | 0.000163646 | 0.009153 |
| c38771.graph_c0 | 3 | 1 | 0.000163646 | 0.009153 |
| c38961.graph_c0 | 3 | 1 | 0.000163646 | 0.009153 |
| c39162.graph_c0 | 3 | 1 | 0.000163646 | 0.009153 |
| c39337.graph_c0 | 3 | 1 | 0.000163646 | 0.009153 |
| c39433.graph_c1 | 3 | 1 | 0.000163646 | 0.009153 |
| c39683.graph_c0 | 3 | 1 | 0.000163646 | 0.009153 |
| c40002.graph_c0 | 3 | 1 | 0.000163646 | 0.009153 |
| c40342.graph_c0 | 3 | 1 | 0.000163646 | 0.009153 |
| c40574.graph_c0 | 3 | 1 | 0.000163646 | 0.009153 |
| c40775.graph_c0 | 3 | 1 | 0.000163646 | 0.009153 |
| c40850.graph_c0 | 3 | 1 | 0.000163646 | 0.009153 |
| c41171.graph_c0 | 3 | 1 | 0.000163646 | 0.009153 |
| c41521.graph_c0 | 3 | 1 | 0.000163646 | 0.009153 |
| c41998.graph_c0 | 3 | 1 | 0.000163646 | 0.009153 |
| c42204.graph_c0 | 3 | 1 | 0.000163646 | 0.009153 |
| c42215.graph_c0 | 3 | 1 | 0.000163646 | 0.009153 |
| c42291.graph_c0 | 3 | 1 | 0.000163646 | 0.009153 |
| c42334.graph_c0 | 3 | 1 | 0.000163646 | 0.009153 |
| c42364.graph_c0 | 3 | 1 | 0.000163646 | 0.009153 |
| c42490.graph_c0 | 3 | 1 | 0.000163646 | 0.009153 |
| c42660.graph_c0 | 3 | 1 | 0.000163646 | 0.009153 |
| c42677.graph_c0 | 3 | 1 | 0.000163646 | 0.009153 |
| c42879.graph_c0 | 3 | 1 | 0.000163646 | 0.009153 |
| c42917.graph_c0 | 3 | 1 | 0.000163646 | 0.009153 |

---

|                 |    |   |             |          |
|-----------------|----|---|-------------|----------|
| c43111.graph_c0 | 3  | 1 | 0.000163646 | 0.009153 |
| c43152.graph_c0 | 3  | 1 | 0.000163646 | 0.009153 |
| c43219.graph_c0 | 3  | 1 | 0.000163646 | 0.009153 |
| c43513.graph_c0 | 3  | 1 | 0.000163646 | 0.009153 |
| c43840.graph_c0 | 3  | 1 | 0.000163646 | 0.009153 |
| c43964.graph_c0 | 3  | 1 | 0.000163646 | 0.009153 |
| c44357.graph_c0 | 3  | 1 | 0.000163646 | 0.009153 |
| c44448.graph_c0 | 3  | 1 | 0.000163646 | 0.009153 |
| c44532.graph_c0 | 3  | 1 | 0.000163646 | 0.009153 |
| c44605.graph_c0 | 3  | 1 | 0.000163646 | 0.009153 |
| c44649.graph_c0 | 3  | 1 | 0.000163646 | 0.009153 |
| c44715.graph_c0 | 3  | 1 | 0.000163646 | 0.009153 |
| c44932.graph_c0 | 3  | 1 | 0.000163646 | 0.009153 |
| c45144.graph_c0 | 3  | 1 | 0.000163646 | 0.009153 |
| c45849.graph_c0 | 13 | 2 | 0.000109671 | 0.009153 |
| c45986.graph_c0 | 3  | 1 | 0.000163646 | 0.009153 |
| c45997.graph_c0 | 3  | 1 | 0.000163646 | 0.009153 |
| c46357.graph_c0 | 3  | 1 | 0.000163646 | 0.009153 |
| c46845.graph_c0 | 3  | 1 | 0.000163646 | 0.009153 |
| c46880.graph_c0 | 3  | 1 | 0.000163646 | 0.009153 |
| c47117.graph_c0 | 3  | 1 | 0.000163646 | 0.009153 |
| c48109.graph_c0 | 3  | 1 | 0.000163646 | 0.009153 |
| c48219.graph_c0 | 3  | 1 | 0.000163646 | 0.009153 |
| c48340.graph_c0 | 3  | 1 | 0.000163646 | 0.009153 |
| c48393.graph_c0 | 3  | 1 | 0.000163646 | 0.009153 |
| c48434.graph_c0 | 3  | 1 | 0.000163646 | 0.009153 |
| c48626.graph_c0 | 3  | 1 | 0.000163646 | 0.009153 |
| c48717.graph_c1 | 3  | 1 | 0.000163646 | 0.009153 |
| c49271.graph_c0 | 3  | 1 | 0.000163646 | 0.009153 |
| c50032.graph_c0 | 3  | 1 | 0.000163646 | 0.009153 |
| c50045.graph_c0 | 3  | 1 | 0.000163646 | 0.009153 |
| c50544.graph_c0 | 3  | 1 | 0.000163646 | 0.009153 |
| c51023.graph_c0 | 3  | 1 | 0.000163646 | 0.009153 |
| c52104.graph_c0 | 13 | 2 | 0.000109671 | 0.009153 |
| c52363.graph_c0 | 3  | 1 | 0.000163646 | 0.009153 |
| c52407.graph_c0 | 3  | 1 | 0.000163646 | 0.009153 |
| c52603.graph_c0 | 3  | 1 | 0.000163646 | 0.009153 |
| c52646.graph_c0 | 3  | 1 | 0.000163646 | 0.009153 |
| c52729.graph_c0 | 3  | 1 | 0.000163646 | 0.009153 |
| c52930.graph_c0 | 3  | 1 | 0.000163646 | 0.009153 |
| c52995.graph_c0 | 3  | 1 | 0.000163646 | 0.009153 |
| c53106.graph_c0 | 3  | 1 | 0.000163646 | 0.009153 |
| c53158.graph_c0 | 14 | 2 | 0.00013881  | 0.009153 |
| c53189.graph_c0 | 3  | 1 | 0.000163646 | 0.009153 |

|                 |    |   |             |          |
|-----------------|----|---|-------------|----------|
| c53386.graph_c0 | 14 | 2 | 0.00013881  | 0.009153 |
| c53666.graph_c0 | 3  | 1 | 0.000163646 | 0.009153 |
| c53676.graph_c0 | 3  | 1 | 0.000163646 | 0.009153 |
| c54007.graph_c0 | 14 | 2 | 0.00013881  | 0.009153 |
| c54479.graph_c0 | 13 | 2 | 0.000109671 | 0.009153 |
| c54656.graph_c0 | 3  | 1 | 0.000163646 | 0.009153 |
| c54888.graph_c0 | 14 | 2 | 0.00013881  | 0.009153 |
| c54996.graph_c0 | 3  | 1 | 0.000163646 | 0.009153 |
| c55089.graph_c0 | 3  | 1 | 0.000163646 | 0.009153 |
| c55766.graph_c0 | 3  | 1 | 0.000163646 | 0.009153 |
| c56101.graph_c0 | 3  | 1 | 0.000163646 | 0.009153 |
| c56164.graph_c0 | 3  | 1 | 0.000163646 | 0.009153 |
| c56465.graph_c0 | 14 | 2 | 0.00013881  | 0.009153 |
| c56661.graph_c0 | 3  | 1 | 0.000163646 | 0.009153 |
| c57014.graph_c1 | 3  | 1 | 0.000163646 | 0.009153 |
| c57316.graph_c0 | 14 | 2 | 0.00013881  | 0.009153 |
| c57550.graph_c0 | 14 | 2 | 0.00013881  | 0.009153 |
| c57593.graph_c0 | 3  | 1 | 0.000163646 | 0.009153 |
| c57932.graph_c1 | 13 | 2 | 0.000109671 | 0.009153 |
| c58005.graph_c0 | 13 | 2 | 0.000109671 | 0.009153 |
| c58075.graph_c0 | 3  | 1 | 0.000163646 | 0.009153 |
| c58151.graph_c0 | 3  | 1 | 0.000163646 | 0.009153 |
| c58312.graph_c0 | 13 | 2 | 0.000109671 | 0.009153 |
| c58329.graph_c0 | 3  | 1 | 0.000163646 | 0.009153 |
| c59042.graph_c0 | 3  | 1 | 0.000163646 | 0.009153 |
| c61079.graph_c0 | 3  | 1 | 0.000163646 | 0.009153 |
| c63409.graph_c0 | 3  | 1 | 0.000163646 | 0.009153 |
| c57190.graph_c0 | 15 | 2 | 0.000172555 | 0.009552 |
| c58949.graph_c0 | 15 | 2 | 0.000172555 | 0.009552 |
| c59000.graph_c0 | 15 | 2 | 0.000172555 | 0.009552 |



**Table S3. The primer sequence of qRT-PCR**

| Rrimers | Sequences                       | Size (bp) |
|---------|---------------------------------|-----------|
| q42942F | 5' GGCTTTCCCTTCTACGGCTAT 3'     | 177       |
| q42942R | 5' ATTGAACACTGTTGTGGCACC 3'     |           |
| q46352F | 5' CCACTTGGTCACCTCGTCTT 3'      | 92        |
| q46352R | 5' TCGTCATCGACAGGGCTATT 3'      |           |
| q58332F | 5' GAATGGGTTTGCGAATAAGTG 3'     | 93        |
| q58332R | 5' GCTGAAAGAGCGAAAGGTGT 3'      |           |
| q58361F | 5' CGTGGCAATCAGCAGTCAGA 3'      | 147       |
| q58361R | 5' CAAGCAAATCAGCGGCAGT 3'       |           |
| q54876F | 5' GTTATCTGTAAATCTAGGCTGGGG 3'  | 129       |
| q54876R | 5' TTTGCTGGTGGTGCTCTACAT 3'     |           |
| q57417F | 5' GCGATAGTGGCGACGAAA 3'        | 222       |
| q57417R | 5' TCTATCCTCTACCCTCCTCGTC 3'    |           |
| q55633F | 5' CTTCTCATCCTTCCACTTTGTCTTA 3' | 120       |
| q55633R | 5' AAAACCGACAAGGAATGGGAG 3'     |           |
| q58526F | 5' ATTCAACATTGGAAACGGTGG 3'     | 236       |
| q58526R | 5' AATCTCATCGCAGGCATCG 3'       |           |
| q53143F | 5' GGAATCACAATCCGAAACACC 3'     | 171       |
| q53143R | 5' CGACGAGATGAAATCCTGGG 3'      |           |
| qActinF | 5' GGTCTATTCTTGCTTCCCTCAG 3'    |           |
| qActinR | 5'GAACTCACTATCAAACCCTCCAG3'     |           |

Table S4 The flowering time of parental and twenty early-flowering and late-flowering of F<sub>1</sub> population strains.

| Number of strain | First-flowering<br>dates<br>(Month.<br>Date) | Last-flowering dates<br>(Month. Date) | Blooming<br>period (Days) |
|------------------|----------------------------------------------|---------------------------------------|---------------------------|
| male parent      | 4.17                                         | 4.23                                  | 7                         |
| female parent    | 4.11                                         | 4.21                                  | 11                        |
| 7-26             | 4.3                                          | 4.12                                  | 10                        |
| 7-29             | 4.3                                          | 4.12                                  | 10                        |
| 7-30             | 4.3                                          | 4.12                                  | 10                        |
| 7-46             | 4.3                                          | 4.12                                  | 10                        |
| 7-50             | 4.3                                          | 4.12                                  | 15                        |
| 7-58             | 4.3                                          | 4.14                                  | 12                        |
| 9-13             | 4.3                                          | 4.13                                  | 11                        |
| 9-26             | 4.3                                          | 4.12                                  | 10                        |
| 7-22             | 4.4                                          | 4.13                                  | 10                        |
| 7-33             | 4.4                                          | 4.12                                  | 9                         |
| 7-35             | 4.4                                          | 4.12                                  | 9                         |
| 9-25             | 4.4                                          | 4.12                                  | 9                         |
| 7-15             | 4.5                                          | 4.17                                  | 13                        |
| 7-28             | 4.5                                          | 4.17                                  | 13                        |
| 7-52             | 4.5                                          | 4.12                                  | 8                         |
| 8-23             | 4.5                                          | 4.17                                  | 13                        |
| 8-60             | 4.5                                          | 4.17                                  | 13                        |
| 8-62             | 4.5                                          | 4.10                                  | 6                         |
| 8-30             | 4.6                                          | 4.20                                  | 15                        |
| 8-4              | 4.6                                          | 4.14                                  | 9                         |
| 8-2              | 4.8                                          | 4.14                                  | 7                         |
| 8-20             | 4.8                                          | 4.19                                  | 12                        |
| 8-21             | 4.8                                          | 4.15                                  | 8                         |
| 8-24             | 4.8                                          | 4.19                                  | 12                        |
| 8-33             | 4.8                                          | 4.14                                  | 7                         |
| 8-50             | 4.8                                          | 4.17                                  | 10                        |
| 8-59             | 4.8                                          | 4.17                                  | 10                        |
| 8-63             | 4.8                                          | 4.20                                  | 13                        |
| 9-3              | 4.8                                          | 4.14                                  | 7                         |
| 7-11             | 4.9                                          | 4.17                                  | 9                         |
| 7-18             | 4.9                                          | 4.17                                  | 9                         |
| 7-38             | 4.9                                          | 4.17                                  | 9                         |
| 7-51             | 4.9                                          | 4.17                                  | 9                         |
| 7-59             | 4.9                                          | 4.17                                  | 9                         |
| 8-70             | 4.9                                          | 4.19                                  | 11                        |
| 7-31             | 4.10                                         | 4.17                                  | 8                         |

|      |      |      |    |
|------|------|------|----|
| 8-22 | 4.10 | 4.20 | 11 |
| 8-28 | 4.10 | 4.20 | 11 |
| 8-53 | 4.10 | 4.13 | 4  |
| 8-47 | 4.14 | 4.17 | 4  |
