# Supplementary material for: Screening of Genes Related to Early and Late Flowering in Tree Peony Based on Bulked Segregant RNA Sequencing and Verification by Quantitative Real-Time PCR
Source: MDPI journal article supplement (doi:10.3390/molecules23030689), 2018-03-19
Supplement: s1 [file s1]

Appendix 1 7 sequences related to flowering genes

>c42942.graph\_c0

AGCCGATTTCTTAGTCCCAGCCATAGTTGAGTGACAAGCAACAACCATTAT  
ATAAACCAAAATCAAGACAACATTATCTAATCAAATTTTCAAGATCTAAGCT  
GCTTTCTTCAATGGCTTCCAGACCACTTCGTTACTTCCTCTATCTATACCTGT  
ACCTCCTTTTTCTTCTCCAACCTCCACAACCTCATCCGCACAAGATGTTGTCAA  
GGCTGCTTACTGGTTTCCAGGCAGTGAATTCCCAGTTTCCGACATCGACTC  
CACTCTTTTTTACTCATCTCATCTGTGCATTTGCCAACTTAGATACCCAAACC  
AACCAACTTGTTATTTTCATCTGCAAATACACCTTCTTTCTCCAGCTTTACAA  
AAACCGTCCAACCTGAAAAACCCTTCAGTTAAAACCTCTTATCCATCGGAG  
GGGGAAATGTGGCCTCGGAAACCTTCGCTTCAATGGCTAGTCAATCTAGTT  
CACGTAAAACCTTTTATTGATTCTTCGATCAAGTTGGCGAGAAGTTATGACTT  
TCATGGCCTGGACTTGGATTGGGAGCACCAACAATGAATTCTGAGATGAC  
TTCCTTGGGTTTGCTCCTTGACGAGTGGAGAGCGGCTGTCGACACCGAGA  
CCTCTGATTCTGGACTACCAAAGTTGATTCTGACAGCAGCAGTTCCATTCA  
CGCCGCTGATTAATTCAATTGTTTATCCCACTGCATCTTTATCAAGGAACCTG  
GACTGGATCAATGTAATGGCATATGACTTCTATGCACCAAACAGAGCTAGTG  
CCTCAGGTGCAACACACTCGCATGCTGCTTTATACGATTCATCAAGTGATGT  
TAGTGCAAGTTATGGGATTGAAAAATGGATTGAAAGGGGGGTTTCTTCAAA  
GAAGATAGTAATTGGCTTTCCCTTCTACGGCTATGCATGGCTTCTTACAAGC  
CCTAATAACCATGGCATTTTAGCACCTGCTAATGGACCAGATCTTTCGGTTG  
GTGGATACGTCGGAAGTGATGGGTCCATTGGGTATAACCAGATCAAGGTGT  
TTATAGGGCAAAAGGGTGCCACAACAGTGTTCAATGATACAATTGTTGCGG  
ATTATTGCTACGTTGGGACGTCTTGGATTGGTTATGATGATGTGCAGACTATT  
TCCACTAAGATTCGTATGCTAAAGGAAAAAGGTTGCTTGGTTATTTTGCAT  
GGCACGTTGGGTCTGATGATAGCTGGGTCCCTTCTAAACAAGCTTCACAAA  
CATGGGGAGCTTAAATATTTGTTTCTGGTAACAGGACTAATAAACCATAATA  
AAATAATGAACTATTTGATCAATGATAAATAAATATTAATATGGGCCTTACAA  
GACCATTTTGTAACCTGCTGCTTAAAAAACAATTTTGTTCTCTTCCTTTTGCA  
TTTCTAAACTGAATTGTGATGGGTAGGAATGAAGTAAGTGTGTGATAAAATT  
TCCATATCCAAGTATGTTCTTGTAGCCAATAAGATACACCTCATTATAAGATG  
AACATATGATTAAGAACTCCATGACTCTACCTTAAGTTCATATGGCAAAACA  
AACTCACAGGAATAACTTAATAATCAGATGATGTTTCGTTTACAACCAATAA  
ACCACAGAGACAGTGAACATGAACAAGTTAAACATATTATTATTTGTTTAT  
AATCAACATTTCTCACTTTTATTACTTTAATATTATGCCACTTTGTAATCACC  
AAACAAGTGAAAATTACATTATACGAA

>c46352.graph\_c0

AAAGTAACCTTCCTTGTTTCAACCATGGTTCTATTTAAACACCCAAAATTTA  
CAAGGTAGAAAACAATGGAATATAACGACAGAGAAATAATTATTCCAACCTT  
AAACTCTGAAGAATACAAAAGATTATTCACAAGGTAGAGAACGATTACAGT  
AAATTAGATTTGTGATCTCCATTGCAAGGTTGGAGATATTACCCATGTACAT  
GTTCTTGCTTGTCAATGGTGACTTACGAACAGGCAATTCTTTGAATCCTTCT  
TCACAGTCTCCAGGTCCCTGAAAAAACATACTAAGTCTTATATACAAGTCTC

CATAACAATCTTCACGGTATATCAACTTCAGAGCTTCATCAAGGTAAGCAAT  
GCCTTGTTTCATAGAGCTCATAACACATCTTAAGGCGCCACTTGGTCACCTCG  
TCTTTGCAGTCCAGAAGAAGAAGAGTAATGTAAGAAGAAGTCATATTCCTC  
TTGGCAATAGCCCTGTCGATGACGATACCCAGAATATCTCTCGAGTTCAAGC  
TTGAATCACGGCTTCGAGGGTCAGCCTGAACTGAAGAGACGCACAATTTG  
TTGAAAATAGTTCCATTGCACATTTTCTGAATCAAAGCTTTGCTGGGTAGTT  
GTTTTTTGGCAACTTCAGTCGCCCCCTGTGATTGTAGGATTGTTTAGAGAAAC  
AGAGGAAGCAAAACATAAAAGGAATGCTAAACTAACCGTTAACAAAGCCA  
TTTATAATTTTATATCTGAAACAGAGCACACAAATGATCTAAAAATGCTCTG  
TTATG

>c58332.graph\_c0

TAAATTATGATGTCATTTTACTCATTTGTTGTCAGAGCTTGTGTTTCCATTAA  
TTATTATTGAGTAATAATGTGAACGTTAATAACAAGAACTGTGTATATTCATA  
TACATAAGTACATTTTTTTGGGTAATTTTGAATCCACTTTGTTTCAGAGTTACAA  
AACTAGGCAGTCCTCCCTAACTTTGATGAAGGCAGTTATTATACTGTTACAA  
ACTCCACACATTTTCTTGGACAACCTTCTAGTTCATCATATCTCATATGTCAT  
TCCAACCCTGAGAATCTTACCATGTGGAATTGCCATCATTTTCCCCTTTTGC  
CTGAAGTTTTTCCCTCAGAAAACATAAGCATAGTTGACAACCTATCTTCTTGA  
AAAAGGAGGAATTCTGTTGTGCCACCACTTCTGCTTCTCCCAGGAGATAGA  
CCACACCTCTGTCCTTTGCTCTCTGCACAACTGCATCTCCTCTTCAGCTCC  
CTGCAACGGCCTTGTGCTAATTCCATTGGATGAATTTGTTGACTTGGCCACA  
TCAATCGACTGGTTGGATGCTGATGAACCACGAGTTGGGTTAGACTGTTGA  
GATCGTTCCACATTGTGAACCAACGATGAACGAGATCCTTTTGCTTGTCCAT  
CTTGCACTAGTATTGTCGAGTGCTCGAGGTTAACTGGATCAGCCATTTGCTC  
AGTGGTTTTCCCCTTCTTCGAGAATGAAATGTTCTGCGGATAAACTCTTTC  
AACTGTTCCACTAGTTGGTTCTCAAACCTTGGGTCTTCAATCTTGTCTT  
TATATCCGTACCTTACAACGCATCTGAACATCCTGTAATCTCTTGGCTCGACC  
TGTCGGAACAGATATCGCTCCTCCAGAGCTACTTTACTAATAGGAATGGACT  
TAATTGAGACAAACACTAGAACTGAGTGGATGGATGGTATGTTGGCAATGA  
AGTGAGGAAATATCGGAGGGATGCCTTGTACAAGTTCAGAATACAACAGTC  
CTATTCCTGGCACCCGGTTTATTTCTGGGTGGAGGCCAATTCTCTTATGAA  
CCCACTAGAAACCTTGTTATTGAGCTCAAACATATACCTTTCTTTGTGTACG  
TAATGCCATATCCCCATTACCACCATTAGGACAGATGCGAAGCCTAGAGGAA  
GGTAACCACCCTGTGTGAATTTGTACAGGACTGCTGATAGATATGTGCCCTC  
TACGGAAATAAAGACCACAAAGAAGAGAGCAACCAACCATATGCTCTTCTT  
CCATATGACGAGCATTATAACAGTGGTCAAACCTTGTTGAGATCACCATTACA  
TACATTAACCACAACAACCTCCATATGCATTGTCAATCTTTTCCACGGTCTTA  
AATGCGGAAGTTACTATAACACAAGTAACCATAATCAAGTAATTGAGCTCTG  
GTATGTAAACCTGACCGTCGTGCTTAGCAGAAGTATGAAATATCTTAACGTT  
CGGGAAACAGCCTAGACTCACGGCCTGATACATAATCTGAAAAGCCCCTAA  
TATCATAGTTTGGCAGGCTATAATTGCAGCTGCGACAGCCACAACGAATGT  
GGGCCAATACAATGGATCTGCATACCAGTGGAATGTAAATAATAGAAAGTA  
AAATTTTAAAGATTTTGAAGCTTCAAATCGTGACAAAAAACTATTTGAGTTA

ACAGTGTCTGTAAGCTTTTACAACATAAAATCTGGACAATAAACTATTTGA  
TTTTTTTAGTGTAAGATAGTGGGCCAACAGTGTATATCAAGCAAATACTCCT  
CATCAGACTGACTGGTTAACAGATAGGTGTAATAAACGGGGATCAGATTTG  
AACCCCTGATCTCTAAGACGCTAATACCAAATGCTAAAGTCATAAACACGT  
GGTATGTGGATCAACAATGTATATCGAGTAACAAGGACTATCCTTTACAATA  
GTACCTATTAAGAGAATTACCTGGAATCGAGTCATAAAAAGTATTTCCACACA  
TTATTAGGGAATTTTGTGAGGTATGTAGCCTGCCACTATATGCAAGTGCTA  
ATGCAGGAAACACAACGCATAAGAACTAATATACAAGTTTACAAAAGAG  
AATAAATACACCAGTTCTTAGCGCCGGGAACCAGCTTGTTTTCAAAAAAAT  
ATTGGTAAATGTCCAATGTATATCAGATCACCTGGACTGCTCGGACACTGAA  
GTGACCAAGATCAGCAAACATGGCTTCCGTTCCCTGTAATGCACATAACAAC  
TCCACCAAGGGATATCCATCCCTTTTTACCATTCTCTTGAAGTAATCTAAG  
ATGTATATGGGATTGAAAGCACGCAATACACCCAAATCATATTTAAATAAGT  
TGTGGAGACCAATGCCACTGATGAATAAAAACCATACACAGATGATGGGGG  
CAAATGAGTATCCCACTCTATCGGTGCCAAATTGTTGAACAGAGAAGAGGA  
TGATCAAGATTGCTACTGAAATTCCCACAACAGCATCTTCGCTTAGCGCCTT  
GACACCGCTCACTGCGGAAAGGACAGAGATGCATGGAGTTAGGATTCCT  
CTCCAATCACCATGGAAGTACCAAGAATGGTGAAGAGGAAAAGCATCACT  
TTGGCAGCCTTACTGTGCTCGAGCTTCCCTTTAATTTTTTCAGCTCGTCTCA  
GATTATTTGATGGTATGTCTAGTCTGTAGTTGGATAGCTCCCTGTCCTCTGGC  
TGCTGATTTGGAAGTAAGCTCACATTTGCATACCGGCTTAGCAAGGAATAC  
AGGGCAAATGTTCCACCGACGCCATTGTCGTTGGCAGACAACACAATAAA  
GACATATTTAATAAGGGGCACCAGCACCAGGGTATAGATTATGAGGGACAA  
AACCCCAAGAATATCGTCTTTGTGGCCAATCTCATTGGGGAAAGTGCTGGC  
GAACACGTACAGGGGAGAAGTTCTTATATCGCCATAGACAACCTCCTATCGC  
CTGAAAAGCTAACTCAGCGTCGTCGTCCTATTTACCTTGGAGGAGGAATG  
GGTTTGCGAATAAGTGAGTCTTCCAGCCTCCAAGTTGAGGGAGTCTACACG  
GCGGAGTTTGGCCCATGACACCTTTCGCTCTTTCAGCTTGTTTTCGACTTCT  
GTGGTGTCTAATCCTTCATTTGTATTAGTATCTGCCGCTTCTCTGCCATTTTT  
CTTATGAAATAAATCTGCTTCTGTTTCC

>c58361.graph\_c0

GAAATTTATATGTTCTGTCCTTGGACCAACCAGATGTAGTTGCGTGTAACAG  
TTGAGCATGCATATAGTTGTATATATATAATAACGACTACAACCTTAAATTGT  
TATACTTCAAGTTCTTGATTTTACGCCACGCAAAATCTGAAGTTAAAGAAA  
TAATGGTTTTCGAGGTGGTGGAAATTTATATGTTCTGTCCTTGCTGCTGAGAT  
TATCTTCTTTCATGGCTTCTCCCGTTCAGAACCAGCCCCAAATTACACGTTT  
GTCCATGAAGCAACATGGGCTCCTGCCACAGCCTCTTACGACTACATAATC  
ATCGGTGGAGGAACTGCTGGTTGTCCGTTAGCCGCCACTCTCTCTCAGAAC  
GCCACCGTCTTACTACTCGAAAGAGGCGGCTCGCCTTACGGAAACGACAA  
CATCACCGAGATGGAATCTTTCGGCAACCCTCTAGCCGACCACTCTCCCTC  
ATCGCCTTCCCAATTCTTTATCTCTAAAGATGGAGTCTTCAACTCAAGAGCA  
CGTATACTAGGCGGCGGAACAGCCTTGAACGTTGGGTTCTATTCACGGGCT  
GGTACGGAGTATGTTAAACAAATGGGTTGGGACCAAGTTTGGTGAACAG

ATCGTTTGAATGGGTGGAAAAGAAGGTGGTGTGTTGAGCCGCGGGTAACGC  
CGTGGCAATCAGCAGTCAGAGATGGGCTGATTGAAGTGGGTGTGACACCG  
TATAATGGGTTTACGTATGATCATTACATGGGACTAAAGTTAGTGGCACAAT  
ATTCGACCGGGAAGGTCATCGACACACTGCCGCTGATTTGCTTGAGTATGC  
TATTCCAAGCAGGATTTCTGTTCTTTTGCATGCAAGAGTTCAAAGGATCTTG  
TTTAGAATCAAAGGAAACAAAAGACCGAAAGCTATTGGAGTAGTATTCAA  
AGATGAATTAGGAAATGAGCACATAGCGTATTTAATGAAGGGGTCAATGAA  
CGAGATCATACTATCAGGCGGTGCAATTGGAAGTCCACAATTGTTGATGCTA  
AGTGGTGTGGGGCCCTAAACATCAACTTAAGGCCCAACATCAGTCTAGTT  
TTAGACCAACCCATGGTTGGCCAAGGGATGGCTGATAATCCAATGAATGCC  
CTCTTCATTCCCTCTCCTCATCCGTTGAAGTTTCCCTCGCTCAAGTTGTGG  
GCATTACCCAATTTGATAGCTATATTGAAACAATGAGTGGGTTGGCCTTGAG  
TTTTTTTTTAGCTCAAGATCAGAATGACCAGCCCTTTGCAGCCACTGTAAA  
AGCTTTTGAAAGCATGAAAAATATTTCCAATGCAACTTACAATAGCGGAGT  
TATAGCAGAGAAGTTTCGTGGGACCTCTATCCACTGGCTACCTTGAGCTTCG  
AAATAAGGACGTTGATGATAACCTTACGTCACCTTTTAACTATTTTAAAGAA  
CCTGCGGACCTGCAAAGGTGTGTTAAAGCCATGAGAACAATTCTAAATGTT  
ATAGATTCAAAAGCTTTCTCAAATACCGGTATGAAAATACTTCCGTACAAG  
TTCTTATTAACACGATGCTCAACTATCCATTGAACTTGCGGCCGAGACATGA  
GATCAATGCATCCATTTTCGTTGGAACAATTTTGTGTAGATACTGTGGTGACT  
ATTTGGCATTACCATGGAGGTTGCCAAGTGGGCAAGGTTGTTGATGAAAAA  
TATAAGGTTCTTGGTGTGATGCACTTAGGGTTGTCGATGCATCTACGTTTAT  
TAAATCCCCTGGAACATACTCAAGCTACTATCATGATGCTCGGAAGGTAT  
ATGGGAGAAAAGATATTGCAAGAGAGGTTATCAGATGGGAGAAAATAGAA  
GATTATTTTCATCTTTTCTATTATTTACTTTAATAAACTAAATTTAAAGTTATCA  
ATAATTGAATATGTTGGCAATTGGTGGATGATAATTTGGTTACCTAAGAGTG  
GTTTAAAGTTGGTTGATCTCAGTGGCCGCATATTTTAAAGTCATTCATAGCC  
ATGTTTCAAGAGAGTTATGCTATAAATTATATGTGCAAGTTATTAATTACTCT  
TCTCAGATTTTAAATAAATGGACTTATATTTGG

>c57417.graph\_c0

GAGATCAAGTTTCATCAATCTCTCCTTTTGTAGCTTTGGGAAGAATCAACA  
GATTGTCTTTTAACTTTGTAAAAATTCTAGAGATTCTACCCGCAACATTCAA  
ATTAATATAAAGTTATATTTGCTGTCTCCATTCTTTATTTTGTGTTTAAGATGA  
GAATTTAGTGCATACAATCATAATACACGTTACAGATAGTGCCTCTAAGTTG  
TGAACCTCGTGACCCAATAAAGATTTTCTAGTCAATGATTATTTTAGGTAAAT  
AACATTATTTGTTTCTCCCTTTAAGCAGGGGAAGCTACTGAATTTCCAAGGT  
CATTTTCTTTGCAGTCTTGGAATTACAATCATCAAGATAATGCTGATAAAC  
GTAGGAAACAAAACCCACATGGCCAACAACATAGCAACCACCTTCACCC  
CATCCATTTTATCATGGAAAAAAACCACAGCAAACACCGGAACCACAGGC  
AAACCCAAAGTACTAATCACGTTAGAAAACAAAGAAGACACTTCAAAAAT  
CAACCCAATCGCACCAATAGAAAAAATCTGCCAAGTCACTGCTGTCCAAAC  
CAGATTCATCACATAAGACAATTTCCCCAGCTCATACCCCTCCATCTCCTTT  
GTCAAACCCTTCCATTCCCCGCTCGCAAAGAGCCCAACTAGAAATTGCGATA

GTGGCGACGAAATTCTGGTAGATAATCATGTCCAGAACCCTCTAAATGTTT  
GCTTTTTTCAGAACTTTTCGGAAACAGAACTGGGTATAGAAAGCATTAAAG  
CGTACCCAGCTGAGGCGCCAACGGTACATAAAAACCCAAGTATGTATTTCC  
CTTTGGGTATTTTGGTTGAACCAGAAGAATCAGATTGGAAGACGAGGAGG  
GTAGAGGATAGAGTGAGGAGGACTAAAGAGTTTATTATGAAAAATGTGAAT  
TTTTGTGAATTGAGGAAGAAGGAGAAGAGCGCATTGAAAGCTAACTGGGA  
TGCACAAATGAGTGAATACGTAGAGACTGGAAGGTATAATAACCCAATCGA  
ATATAACATACAATCCGCTGCTAAGATTAAGCCTAAAGAGATATAAATCGAT  
GCCACCTTCAAGGAAGAAGGTTTTTCTGAGTGAGTTGACTCGGAATGGAT  
GGTTGGATTTTTGGATGGTGAGACGAAGAGACAGGGAAGAAGGATTGGGA  
AGCCTGCGAGTTGTACAAGTGTTGCCATCCACTTGCTTTTCCCACCTTTGTC  
GTAGTATAATCTTCCAAGAGCGTCGCGACTGACTGGCCGGCGAGGACGA  
AGACTGAGTATATTGCCATTCGGAGCCACCAATTGTAATTGAGTCCTGGAG  
GTGGTGGTTGGCAGGTGATTTTTTCATGCTCGGGTAATTTAGCTTCTTTGGT  
TTCCTGATCTATGATGTGGAGTTGTAGTTCTTGAGTTTCCCCCATGTCAATTG  
TAAAAATACTCTCAAGTAAGATCAAGCTTAAAGCTGGAGTTTGCAGTGTGT  
AAGAGAAAGCATGAAACGTATGAACGTTTTGAGAGAGAGAGAGACGTTTA  
TCTCATGCGAAGCAAAGCATGGAATAGATGTGTAGAAATTGTTAACATGC  
ACCTTTGGCAGGTATGACTTGCGAGTCAAAAAAAAAACTAAGTGGATCCCAC  
CGTCAACATCGATATTACATTACCACAGTATCCAATAACCCATCACTAAAT  
GCAGATTCAAATTTGTACCACGCCAAAACCCCCGCTCCTTCGCGCCGGTGT  
CTACAATTCCATTTGCTTGTCCGTAGTTAATTGCTGTCCTATTGGAGGGCA  
GGGACCAAATTATATTTTAATACATATCACTACAAATACATGGTCCAACCTTG  
CCAACGTCGAGCCAAATTCAGAAAGATAATTCTCAACCAACAAAAAAGA  
ATTCCATTAATAATGAATCTTGAATTTGTTTGATACCGCCTACCGGACAACAT  
ATATATGTCACAAACAATCTACCTTTCTCACCAATAAATTGGTTAAAAAGAA  
AAAAGAAAAAAAATCAAGTGTGACAATCTACAATGGCTGCTATACTCCCC  
GCCTTCGACAAATTCAAGATGTATTATCAAATCCGATGCTGCAGCAATGGAG  
GATGTTTTTCTCTCAAAAATCTACATTTTAAAAGCAGCATCTTCCGTATCCT  
TTTTATTGAACACTCCATCTACGTATATGTAAAAAATTTGGTATGTCCATGTC  
CAACACAATATCTTCAAACTCTTTTTGGCGTCTTGACTCATCAGGCCGTTG  
TATGAGGGATCTGAAGAAGAATGAGTGAGATGCAATACAAGCAGAGAGAA  
ATAGCAGCCCCCGCAATAAAATTACATAGAAGTCGTCGATTATCTTTTGTGG  
GTACAAACACCGTCTTAAGTGAGTTGGTCAATTCAAAAAGGCGGAGAGAA  
ACTAAAACATAAATTGCACTGGTGAGCATGAAGTTGAGCAATGGATATTCC  
GGGATAAAAGAAAGAAGCCATTTGGGCTGACCATTAGGTACATTTGATCTC  
AGCCAGATGTGGAACCTGGCAGATATAGGTTTCCAAAGTTATCTTCCAAGC  
CATGCAAAGAGAGTCAAAGAGAAATTCCGAAGATGCTGTGTAAAATTTG  
CAAGCAAATATAAACAGTTATTGGAATCCATGATGTGTAGGGATGCAACTTG  
TTGTAAGTAACCTTGTCCAGTTTGTAATACATTCATACCACAAATAACCAA  
CAAATACAGAAACAGTAACAATGCTTGTCTTAATTGTGAGTCTCCTCTTGGT  
ATCAGATTCTCTAATTTCTCCATCCACTTCTCAACATTGGGATGATAATAGG  
CATATATCATTCCAATAATCCATATATATCGATCCAATCCAGATCGGAAATGCC  
ACTCATGTAATCGCGGGAGATCTGGTTTCATAGGATCACTGTATCCTAATATG

AATGCTAAAGGACGCCAAAAAATCTCAAATACTCCAGGAATTTCCCAAATC  
AAGATAACCACAAGAAAGCATGCAAGAATTTTCACAGCCATCACAGATCTT  
ATTTTCATTATACTTGTGAAAAATACCAAGAGCTCCATAGACCATAACAGTGA  
AAAGCGTATGCATTGGACAAATATAGTACAGCATGTAGTCATTGTTTCAGAAT  
AATACAGCAAAATGCCACCAAGAAATTTAGACGCCACATCATCTGAGCAAA  
GCGTGCAAGACTAAAATCCTTTCTGATATAATAATAAGAGAAATTTCCAAAC  
CCAGTCATCCAGACGTATGCAGCAATAAAGACGCGTATTGCATTGTATATCT  
CCGTTGCAGCAAAATAATGGTACATTAAGAACAGAACCTGCATCCATCCTTT  
CCACTCT

>c58526.graph\_c0

CACACTTTGATTTCCACATCCCGCGTTGCGTTTTTGATTTCTACATCCCACAT  
TGGATGGGGTCACTTTTACAATTTTAAAAAATAAATGGTAATTGTCAAATTT  
TATACAGCATAGTTGAGCTAATATATAATTCAGAAAACTTCTTGGCGATGA  
AAACCTTGCTCCCCGACACAAGCTTAGATGGCTGGGAATCATTATTCTTATC  
CTTGAGGACAGTTGCCCAAATCGATACCATCATTACCGTCTGGAATATTTTG  
GTCTCACTGCTCTAAAGCTGATCGCCACTGAGGAACGGAACGACCAATGTT  
TCAGCATAATTATACTCTACTGCGTTGGCCGCATTACGTACGCAATGTTGA  
AGGAGTTGTCCACGTGGGATAGTTTATCATGTTTCAAATGGACCAAGTCT  
GTAATTCTTACAATTGAAGATGGGTTGTTCCCTACTGTCTTGGACCAGGTCTG  
ACTTATAACAGTTCTACTCTGCCAGACATTTTCAATTAAAATCATATGTTAGG  
ACAACAGATCGGACATGAACCTTTATTCAACATTGGAAACGGTGGTCACCA  
AGTATTCAAATATCAATAGTAAGGAAACGCATGATAGTTTAGCAGAGCTCCC  
TGAAATCATGCATAAGTTGGCAAAAAAGACTGACGGTGATAATACCAAAAA  
CGACTTGAGGAGCTTCGCTCGGGTCTTCTTGAGGTTATTATTGAGAAGCT  
TGGCAGCACAAAGTTATGTTGCCAACGACTTAATAGTCGATGCCTGCGATGA  
GATTATGGAATTGATGGTCGTGCTTTTGTTCATCCACGGCGTAGGAGCAACCT  
TTAATTATTAGTGGTTCTGCCCATTCGGTTATGGTCCTCTTAAGTCCACCAGC  
TAGTTTTTCTATTGGTTTTCTTCCCGTTAGAATCTCTAATAAAAGTATGCCAA  
AACTGTAGACGTCGCAACTCTCGGATACCTTGCCCCACATGGCATATTCTGG  
TGCCAGGTATCCCAAGGTGCCCTTAACACGGGTGGTCATGTGGCTAACGCC  
TTCTGGGATTAAGTTGGCAAACCCAAAATCAGCAACCAGTGGCTCAAAATT  
TGAATCCAGTAGCACATTACTGGCCTTGATATCTCTATGAATGATGTGGGGT  
GTCACCTCATGGTGCAAGTACAGTAGGCCTTCTGCGGAGCCGATTGCAACC  
TTCATCCTCCTTTTCCAATCTAGTTGTACATCGGCTGCAAACCTGGCCGTGGA  
GATGAGAAAGTAAGCTGAGATTTGGCATGTAATCATAGACAATAAGCCGTT  
GATCTGTTCCAGCGCAATAACCCCTAAGACCCAACAAATTTTTGTGTGCAA  
CCCTTCCCAGAACTTCAACCTCTACCGCAAATTCATTTTCAGCTTTTAAATT  
CATAGACTTCAACTTCTTCACAGCTATCTGCGCGCATATATATACATATTA  
CAACCATTAATTAATTAATAAAGATATGATCCAATTAATAATAAGGGAATT  
ATTTTGAAGTGAATACCTGAAGACCATCACTCGTTTTTCCCAATAAACACT  
TCCAAACCCTCCTTCTCCAAGCTTGTTATCCTCGCTGAAACCATTAGTAGCC  
GTATGCAATTCCTTGACGTAAATATCCTCCAAGATGTGTTGCCACCACCGC  
TCATTGTCACCCTACAAGCACACAATTAACAATAATTAAATAAATATTCATCT

TCTTAAACAATTTTCATCTAGCTATATAGATTTTCAGTACGGCCTGGACATCAA  
AATTAAGTCCCCCATCTTTGCTATACCCTTCATCAACCTTCTCTCCACCACA  
GCAACTCAACGATGATCCCATTGTCACCCTACCACCTTCTCCGTTCTACTTT  
CTTCTTTTATACTGGAATCATGCCCATTTGGGCAGTTTGCATCTCAGCCGAC  
CTCGGCCGGCATTGCCTTTTTTATTTTAACGGTTATAACTAAGGAGTTGACT  
CCATATGCTACACACGACGATGACACATGTACATAAAAATCAATAGCAACAC  
CTCAATTAGCCTGATAGATGAACATCACCTTAATTAATCTAGATAGTAAATTC  
CTCTTTTCG

>c53143.graph\_c0

AACTATCTCCAGTCTTATAATCACTAATGATGTCAGCCACTACCACTACTACA  
GTTCCAAAGCGTTAGAAAATTGTATGCAAGTTCTCATCTTCAGTAATTGGAT  
TCAGTTTACAACTAATAAACATCTGATGCCTTTTATAATAAAGCACAATATT  
AAACAAAAGAAACCACAATAAAAAACATTATCCTTACTTTTAGTTCCAC  
ATTGCACATCAAGTTACTATATTCCTAGAGAACTTGCTCGTCCACTTGAATAT  
AACAAAAAGATTATCCCATTGTTCAATCCCCTTGATAAGGTAAGATAAACAT  
ATCCTTTGATAAAAATAACTGATATTTATCCGCCGATGACACCAACAACAAT  
ATTTGATAAGGTGATGGGGTCTAGGATTTGGCTACGCAAAAATGGTGAAAC  
CGTGGTGGAGAGAAATGGATGATGTAAGACAGTTAAAATCTATAACATAAC  
ATAAAAAATAAGAACAAAAATTTCAACGCCAACTGTAAATTTCAAAATCCA  
ATAAATATTGTAACATTTAATACCAAAAAAATCTAATGCTGGAGAGGAAGAA  
GATTGATTTCACTACTGGATCATTGCACTTATCCAACCCTTTAGTGATCTCA  
AATATTGAATGGTAGCTTAGGCATTTTACACCAAATTTGTTATGCAAGACCA  
CTCTCTGGAGATTATGAAAGAAACAAAGAAACATGTAATTTGTTACAGAGG  
CCACTCAAAAGATAGGATTCTGATAATCAAGATAGGATTGAACTATTAATTC  
CTGATATGCAAGATAGAGAGAGAATATTTCCAAAGCTCATAAAAATGGATAA  
AAGGAATCATTCAAAGAGAACATTGATCAATTCTTTAAGAATCTAACAGCA  
TGATGATCCTTATCAATAAGAAAATTAGACTCGGATGATCCTCCTCCAGAAT  
ATCTTACCTCTAAGATTACTGTGTAAACAACTTGGTGGAGATTCAAATTGA  
ACCAACGAAGGACTGAAATAAATCAGGCTAGAACCTTGACGCGTTGTAATA  
CTTGATCGAGAAAATGAGATTGTGCTGTAGCTAACTGGTTATGATGATATAA  
TTTTTATATAGAGACAGTGGGATTACAATTTTGAAAAACAGAAGTGAAAA  
GTTTGTGTAACCATAGATTTAAAAATACCAAACCTGAAATCGGCAGCACACC  
TCAGGAATCACAATCCGAAACACCTAGAATAAAAAATAACAAAACCAATTAA  
TTTAAGAAAATTCAAAGGGAATATCTTTATATATATATATAGAAATTGAAAAC  
CAAAAATTCAATTCTTACCTTAATCGAAACCCTCAAATTACTGACAACAACC  
CAGGATTTTCATCTCGTCGAGCGAAGCCCTGAATCGAAACATCCTATAGAAA  
TTGAAACCCTAGAAATTGAAAATAAGAAAACCTTACCCTATTTGTTTCATCG  
ATCAAAACCGAAGAAACCTCTGAGTTTCTTTTCAATTCACCGTCGTCGTTT  
CTCGCTAAGTCACCGACCTTCTCTATAGTTTCTCTTCGGCCAAATCCCCTTT  
AAGCACTCAAAATTCTTCATGATCTCTCGATCCCACTCTTGAGCTCTTGGCT  
TTTTGAAACCCTCGATTCTCGCTGGTCTGTGTACGTCACCGGCATCAAATCA  
GGGAGAAATACCCTTGGCCATCTTCCCTTTTGAGCTTTCTCGAGCTCTCTTG  
GAACGCCTTATCTATTTGACTCGTTATTATAGCTTCGCTTCTGTTCGGATGA

ATTGGCCTAGGATATTCGGATCCGTAGCACCCAATATTTCTTTATAAACATCT  
TTGTCGACGTTTCCTAGGTCTTCAATAATTCATTGTTTCGTATTCTTTATGTG  
CGCTTCGTTTTTCATGCGGCGCTCTTGGGAATGGCCAGTTTTGAGATGAATG  
AGTTTGGAATTAAGAGGAAAAGAAGAATCGAGAATAGGAGCGGGGGTGG  
GAATATGGGAAGAATTAATTAGGAGAATTCGAGATTTGAGAAGTATCGAGA  
ATGGGAGCGGGTGAAGAGAATGGGATTTAATGCAGAGCAAATGGGAAGAA  
TTAATATGGAAGGTTCGAGATTTGAGAAGGATCGACACCCGAGAGGTATCA  
TACTAAGAATTTAGTTTTATTTTTGAAGAAATCGAGTATTTTAGTAATCATT  
ATATGGAGGGTTCAAGATTTGAGA
